# Supplementary material
Source: PubMed Central journal article supplement (PMC2117540)
Supplement: jnnpsyc_jnnp.2006.109512_1.pdf [file jnnpsyc_jnnp.2006.109512_1.pdf]

**Table E1** Results of quantitative head impulse testing in the 24 subjects

| subject      | vestibular function       |              |                 |                         |   |                        |
|--------------|---------------------------|--------------|-----------------|-------------------------|---|------------------------|
|              | search-coil data (gains)* |              | correct answer  |                         |   |                        |
|              |                           |              | normal function | unilateral hypofunction |   | bilateral hypofunction |
| to the right | to the left               | to the right |                 | to the left             |   |                        |
| 1            | 0.94                      | 0.80         | x               |                         |   |                        |
| 2            | 0.29                      | 0.48         |                 |                         |   | x                      |
| 3            | 0.43                      | 0.57         |                 |                         |   | x                      |
| 4            | 0.87                      | 0.79         | x               |                         |   |                        |
| 5            | 0.91                      | 0.88         | x               |                         |   |                        |
| 6            | 0.76                      | 0.56         |                 |                         | x |                        |
| 7            | 0.35                      | 0.60         |                 |                         |   | x                      |
| 8            | 0.73                      | 0.58         |                 |                         | x |                        |
| 9            | 0.77                      | 0.55         |                 |                         | x |                        |
| 10           | 0.62                      | 0.47         |                 |                         |   | x                      |
| 11           | 0.69                      | 0.60         |                 |                         |   | x                      |
| 12           | 0.46                      | 0.50         |                 |                         |   | x                      |
| 13           | 0.70                      | 0.66         |                 | x                       |   |                        |
| 14           | 0.76                      | 0.68         | x               |                         |   |                        |
| 15           | 0.55                      | 0.63         |                 |                         |   | x                      |
| 16           | 0.84                      | 0.79         | x               |                         |   |                        |
| 17           | 0.93                      | 0.82         | x               |                         |   |                        |
| 18           | 0.60                      | 0.62         |                 |                         |   | x                      |
| 19           | 0.85                      | 0.89         | x               |                         |   |                        |
| 20           | 0.90                      | 0.74         | x               |                         |   |                        |
| 21           | 0.76                      | 0.60         |                 |                         | x |                        |
| 22           | 0.64                      | 0.58         |                 |                         |   | x                      |
| 23           | 0.79                      | 0.66         | x               |                         |   |                        |
| 24           | 0.37                      | 0.41         |                 |                         |   | x                      |

lower limit (= average - 2 SD) in healthy subjects (right eye measured)

to the right: 0.71

to the left: 0.66
